# Supplementary material for: Characterization of Staphylococcus epidermidis clinical isolates from hospitalized patients with bloodstream infection obtained in two time periods
Source: PeerJ. 2022 Oct 4;10:e14030. doi: 10.7717/peerj.14030 (PMC9541613; doi:10.7717/peerj.14030)
Supplement: Supplemental Information 1 — The results of antibiotic resistance (MICs), biofilm formation, and information on the clinical isolates used in this work. [file peerj-10-14030-s001.xlsx]

## Sheet: Hoja1
Folio	Hospital	Year	Source	Service	Benzylpenicillin	Erythromycin	Clindamycin	Quinupristin / dalfopristin	Levofloxacin	Gentamicin	Trimethoprim / sulfamethoxazole	Rifampicin	Cefoxitin	Oxacillin	Linezolid	Vancomycin	Antibiotic resistance profile	Biofilm (OD)	SD	Biofilm classification	Folio
585	AGH	2003	blood culture	pediatrics	Resistant	Sensitive	Sensitive	Sensitive	Sensitive	Resistant	Sensitive	Sensitive	Resistant	Resistant	Sensitive	Sensitive	12	0.689333	0.0287673	weak	585
1032	AGH	2003	blood culture	neonatology	Resistant	Resistant	Sensitive	Sensitive	Sensitive	Resistant	Resistant	Sensitive	Resistant	Resistant	Sensitive	Sensitive	7	0.047	0.0936459	non	1032
1042	AGH	2004	blood culture	neonatology	Resistant	Resistant	Resistant	Sensitive	Sensitive	Sensitive	Sensitive	Sensitive	Resistant	Resistant	Sensitive	Sensitive	9	0.538	0.034	weak	1042
1047	AGH	2004	blood culture	neonatology	Resistant	Resistant	Resistant	Sensitive	Resistant	Sensitive	Resistant	Resistant	Resistant	Resistant	Sensitive	Sensitive	3	0.132667	0.0749859	non	1047
1069	AGH	2004	blood culture	neonatology	Resistant	Resistant	Resistant	Sensitive	Resistant	Resistant	Resistant	Resistant	Resistant	Resistant	Sensitive	Sensitive	1	1.1035	0.0210449	strong	1069
1091	AGH	2004	blood culture	pediatrics	Resistant	Resistant	Resistant	Sensitive	Resistant	Resistant	Resistant	Resistant	Resistant	Resistant	Sensitive	Sensitive	1	0.3145	0.006	weak	1091
1103	AGH	2004	blood culture	pediatrics	Resistant	Resistant	Resistant	Sensitive	Resistant	Sensitive	Resistant	Resistant	Resistant	Resistant	Sensitive	Sensitive	3	0.212333	0.0475	non	1103
1126	AGH	2004	blood culture	neonatology	Resistant	Resistant	Resistant	Sensitive	Sensitive	Resistant	Resistant	Sensitive	Resistant	Resistant	Sensitive	Sensitive	5	0.247	0.064994	non	1126
1154	AGH	2004	blood culture	neonatology	Resistant	Resistant	Resistant	Resistant	Resistant	Sensitive	Resistant	Resistant	Resistant	Resistant	Sensitive	Sensitive	2	0.0025	0.0155	non	1154
1161	AGH	2004	blood culture	gynecology	Resistant	Resistant	Sensitive	Sensitive	Sensitive	Sensitive	Resistant	Sensitive	Resistant	Resistant	Sensitive	Sensitive	10	0.556	0.032	weak	1161
4201	VGH	2017	blood culture	internal medicine	Resistant	Resistant	Sensitive	Sensitive	Sensitive	Sensitive	Sensitive	Sensitive	Resistant	Resistant	Sensitive	Sensitive	13	0.105667	0.050625	non	4201
4202	VGH	2017	blood culture	pediatrics	Resistant	Resistant	Resistant	Sensitive	Sensitive	Sensitive	Resistant	Sensitive	Resistant	Resistant	Sensitive	Sensitive	8	0.346667	0.02	weak	4202
4204	VGH	2017	blood culture	emergency	Resistant	Resistant	Resistant	Sensitive	Resistant	Resistant	Resistant	Resistant	Resistant	Resistant	Sensitive	Sensitive	1	0.407	0.029556	weak	4204
4205	VGH	2017	blood culture	internal medicine	Resistant	Resistant	Resistant	Sensitive	Resistant	Resistant	Resistant	Sensitive	Sensitive	Resistant	Sensitive	Sensitive	4	0.176333	0.098	non	4205
4206	VGH	2017	blood culture	emergency	Resistant	Resistant	Resistant	Resistant	Sensitive	Resistant	Resistant	Resistant	Resistant	Resistant	Sensitive	Sensitive	4	0.171333	0.1605	non	4206
4208	VGH	2017	blood culture	internal medicine	Resistant	Resistant	Resistant	Sensitive	Resistant	Resistant	Resistant	Sensitive	Resistant	Resistant	Sensitive	Sensitive	4	0.261	0.0335	non	4208
4210	VGH	2017	blood culture	intensive care unit	Resistant	Sensitive	Sensitive	Sensitive	Sensitive	Sensitive	Resistant	Sensitive	Resistant	Resistant	Sensitive	Sensitive	14	0.0685	0.126339	non	4210
4211	VGH	2017	blood culture	internal medicine	Resistant	Resistant	Resistant	Sensitive	Sensitive	Resistant	Resistant	Sensitive	Resistant	Resistant	Sensitive	Sensitive	5	0.115333	0.0769589	non	4211
4212	VGH	2017	blood culture	intensive care unit	Resistant	Resistant	Resistant	Sensitive	Resistant	Sensitive	Resistant	Sensitive	Resistant	Resistant	Sensitive	Sensitive	6	0.6075	0.0035	weak	4212
4214	VGH	2017	blood culture	pediatrics	Resistant	Resistant	Sensitive	Sensitive	Sensitive	Resistant	Sensitive	Sensitive	Resistant	Resistant	Sensitive	Sensitive	11	0.561	0.0654879	weak	4214
																		0.301	0.043566	non	ATCC 12228
																		1.906	0.273	strong	ATCC 35984
